# Supplementary material for: BPDCN MYB fusions regulate cell cycle genes, impair differentiation, and induce myeloid–dendritic cell leukemia
Source: JCI journal article supplement (doi:10.1172/jci.insight.183889), 2024-11-05

Figure 2B  
ACTB stain

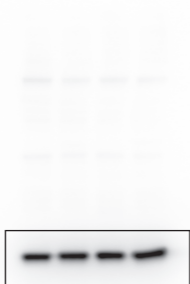

Figure 2B  
GAPDH stain

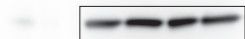

Figure 2B  
MYB stain

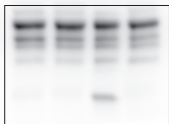

Figure 2B  
V5 stain

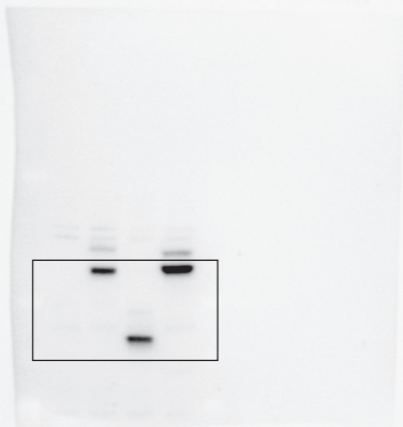

Figure 5D  
ACTB stain (bottom)

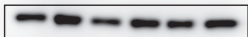

Figure 5D

ACTB stain (top)

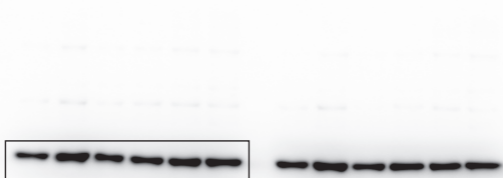

Figure 5D

p16INK4A stain

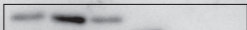

Figure 5D  
p19ARF stain

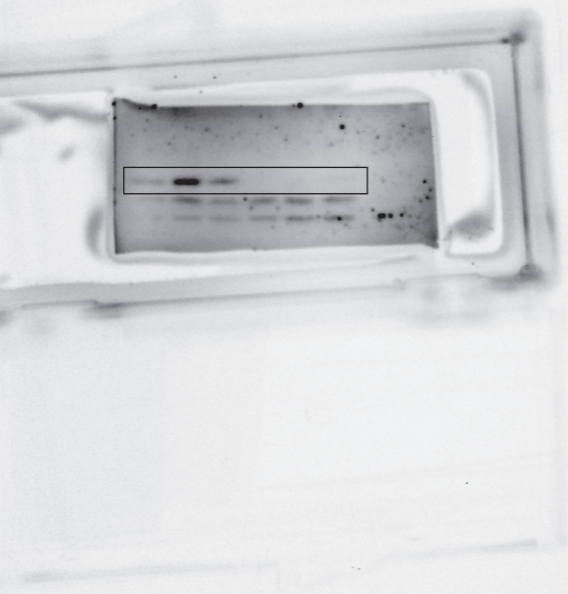

Figure 6H  
ACTB stain

CAL1      K562

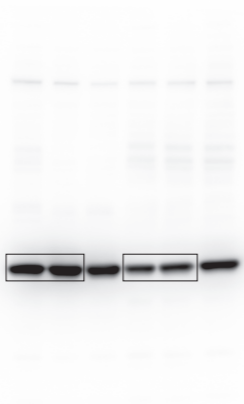

Figure 6H  
MYB stain

CAL1      K562

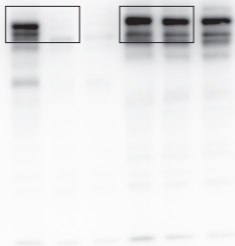

Figure 6l  
ACTB stain

AL04 AL05

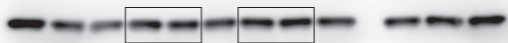

Figure 6l  
MYB stain

AL04 AL05

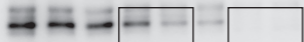

# Figure 6l

## MYB stain (MYB-ZFAT)

AL04

AL05

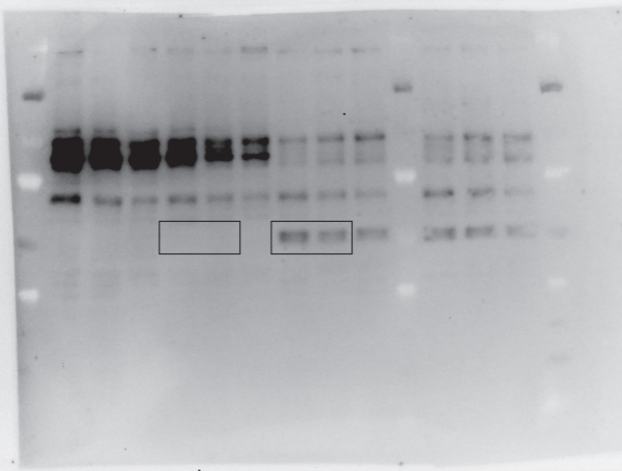

Figure S3A  
GAPDH stain

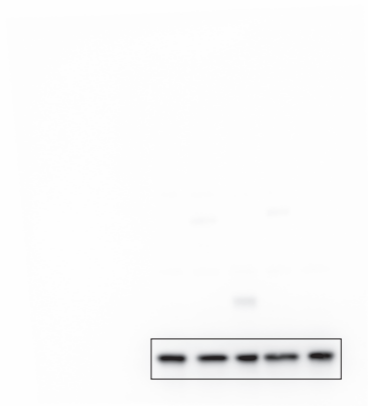

Figure S3A  
V5 stain

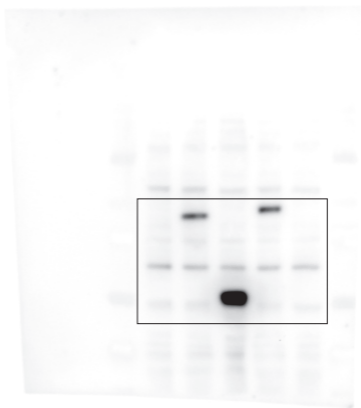

Figure S3C  
ACTB stain

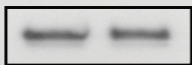

Figure S3C  
p19ARF stain

ACTB band

p19ARF band

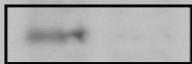

Figure S4C  
ACTB stain (left)

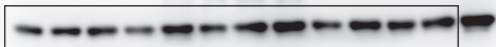

Figure S4C  
ACTB stain (right)

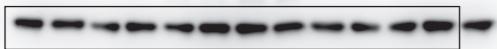

Figure S4C  
MYB stain

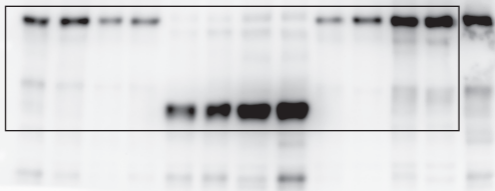

Figure S4C  
p16INK4A stain

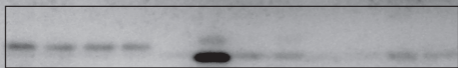

Figure S4C  
p19ARF stain

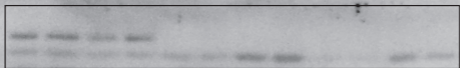

Figure S4C  
V5 stain

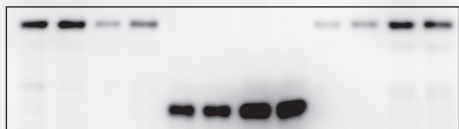

Figure S6A  
ACTB stain

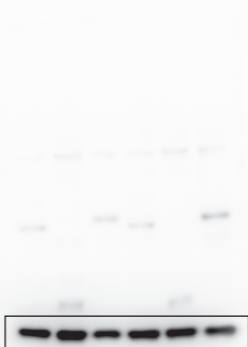

Figure S6A  
V5 stain

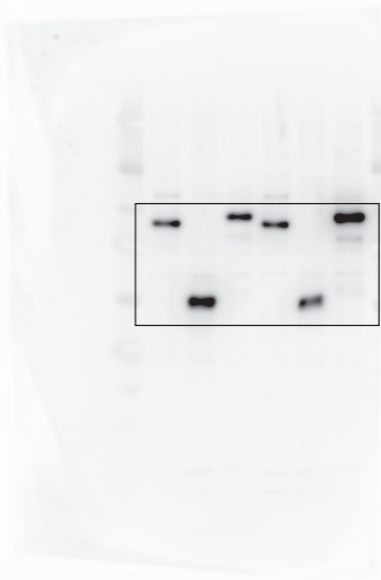

Supplement: sd2 [file 2]
